# Supplementary material
Source: Springer Nature journal article supplement (https://www.springermedizin.de/resource/supplementary/13033_2014_193_MOESM5_ESM.pdf/9652028)

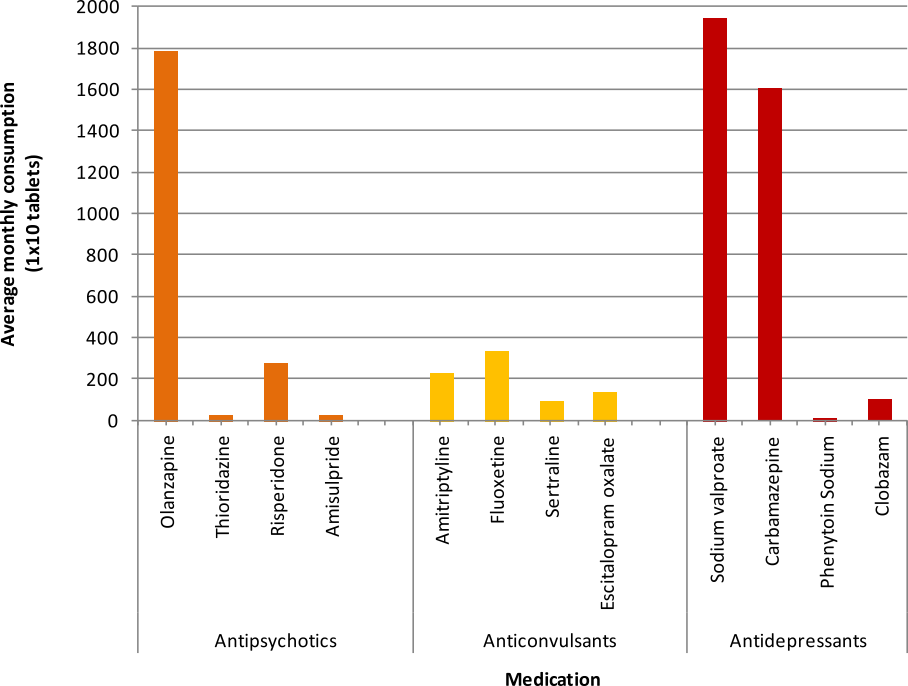

Supplement: MOESM5 [file 9652028]
